# Supplementary material for: miR-143-3p targeting of ITGA6 suppresses tumour growth and angiogenesis by downregulating PLGF expression via the PI3K/AKT pathway in gallbladder carcinoma
Source: PubMed Central journal article supplement (PMC5833358; doi:10.1038/s41419-017-0258-2), 2018-02-07

**a**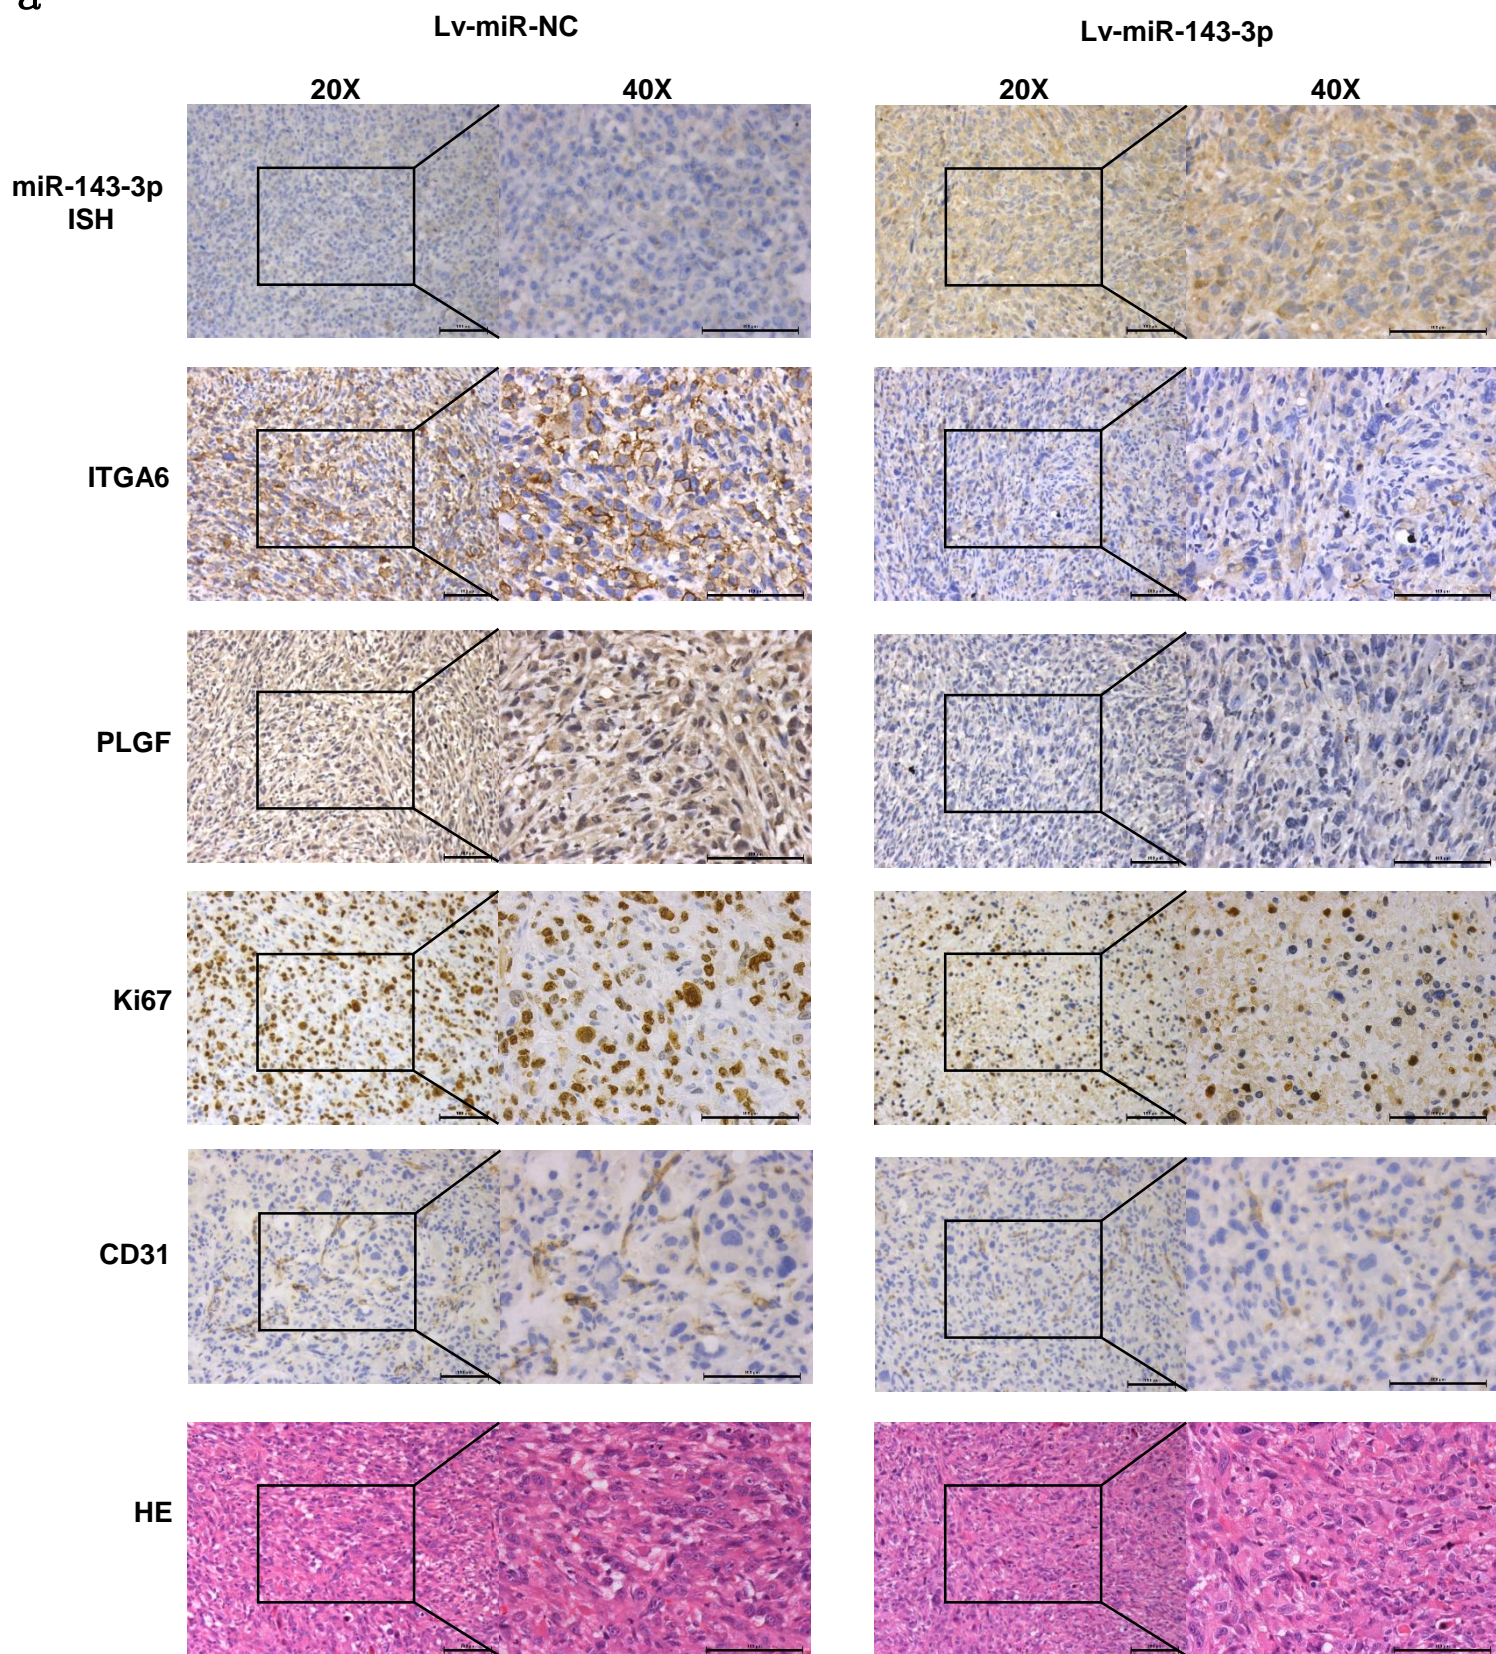**b**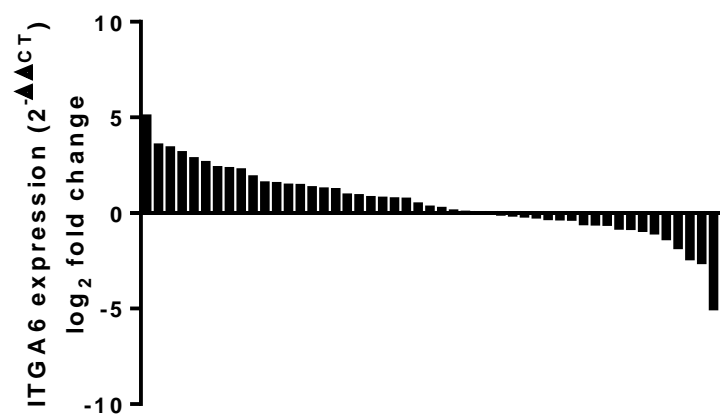**c**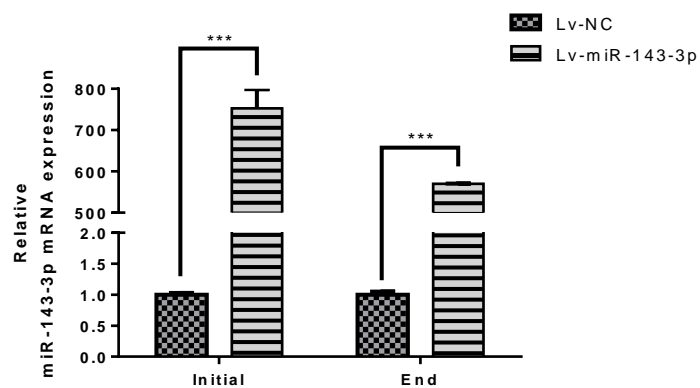

Supplement: 41419_2017_258_MOESM2_ESM.pdf [file 41419_2017_258_MOESM2_ESM.pdf]
